# Supplementary material for: Pilot Study of Neurological Soft Signs and Depressive and Postconcussive Symptoms During Recovery From Mild Traumatic Brain Injury (mTBI)
Source: Atypon-hosted journal article supplement (doi:10.1176/appi.neuropsych.14050111), 2015-07-01
Supplement: appi.neuropsych.14050111.ds001.pdf [file appi.neuropsych.14050111.ds001.pdf]

**Supplemental Table S1. 45 Neurological Soft Signs by Functional Domain**

(R=Right, L=Left, Bi=Bilateral; # denotes the number of scorable signs generated for each maneuver).

**Balance:**

Romberg Maneuver (with scoring for upper extremity synkinesias: 2)

Standing on One Foot (2)

**Gait:**

Normal Walking (1)

Tiptoe-Walking (1)

Heel-Walking (1)

Heel-to-Toe Walking (1)

**Reflex:**

Palmomental Reflex (R/L: 2)

**Sensory:**

Graphesthesia (R/L: 2)

Astereognosis (R/L each with/without palpation: 4)

Extinction (1)

**Motor:**

Foot Tapping (R/L: 2)

Finger-to-Nose (R/L: 2)

Finger-to-Nose-to-Pencil (R/L: 2)

Fine Finger Movements (R/L each with scoring for contralateral synkinesias: 4)

Rapid Alternating Hand Movements (R/L/Bi: 3)

Luria's 3-step Manual Motor Program (R/L: 2)

Visuospatial:

Drawing: Clock (1)

House (1)

Daisy (1)

Face (1)

Abstract Figures (two sets of stimuli: 2)

Assembling Matchstick House (1)

Embedded Figures (easy/hard: 2)

Map Localizations (1)

Money Road-Map Test of Direction Sense (1)

Other:

Tongue Twister (1)

Rhythm Tapping (1)
